# Supplementary material
Source: publisher figshare collection journal article supplement (https://acs.figshare.com/ndownloader/files/4528810)
Supplement: Supplementary file 1 [file 4528810]

  
data_060802a 
  
_audit_creation_method            SHELXL-97 
_chemical_name_systematic 
; 
 ? 
; 
_chemical_name_common             ? 
_chemical_melting_point           ? 
_chemical_formula_moiety          ? 
_chemical_formula_sum 
 'C7 H2 O6 Pr' 
_chemical_formula_weight          323.00 
  
loop_ 
 _atom_type_symbol 
 _atom_type_description 
 _atom_type_scat_dispersion_real 
 _atom_type_scat_dispersion_imag 
 _atom_type_scat_source 
 'C'  'C'   0.0033   0.0016 
 'International Tables Vol C Tables 4.2.6.8 and 6.1.1.4' 
 'H'  'H'   0.0000   0.0000 
 'International Tables Vol C Tables 4.2.6.8 and 6.1.1.4' 
 'O'  'O'   0.0106   0.0060 
 'International Tables Vol C Tables 4.2.6.8 and 6.1.1.4' 
 'Pr'  'Pr'  -0.2180   2.8214 
 'International Tables Vol C Tables 4.2.6.8 and 6.1.1.4' 
  
_symmetry_cell_setting            Orthorhombic 
_symmetry_space_group_name_H-M    Pnma
  
loop_ 
 _symmetry_equiv_pos_as_xyz 
 'x, y, z' 
 '-x+1/2, -y, z+1/2' 
 'x+1/2, -y+1/2, -z+1/2' 
 '-x, y+1/2, -z' 
 '-x, -y, -z' 
 'x-1/2, y, -z-1/2' 
 '-x-1/2, y-1/2, z-1/2' 
 'x, -y-1/2, z' 
  
_cell_length_a                    7.9153(18) 
_cell_length_b                    10.228(2) 
_cell_length_c                    9.528(2) 
_cell_angle_alpha                 90.00 
_cell_angle_beta                  90.00 
_cell_angle_gamma                 90.00 
_cell_volume                      771.4(3) 
_cell_formula_units_Z             4 
_cell_measurement_temperature     294(2) 
_cell_measurement_reflns_used     2973 
_cell_measurement_theta_min       2.92 
_cell_measurement_theta_max       26.42 
  
_exptl_crystal_description        ? 
_exptl_crystal_colour             ? 
_exptl_crystal_size_max           0.126 
_exptl_crystal_size_mid           0.10 
_exptl_crystal_size_min           0.06 
_exptl_crystal_density_meas       NONE 
_exptl_crystal_density_diffrn     2.781 
_exptl_crystal_density_method     'not measured' 
_exptl_crystal_F_000              604 
_exptl_absorpt_coefficient_mu     6.314 
_exptl_absorpt_correction_type    MULTI-SCAN 
_exptl_absorpt_correction_T_min   0.568062 
_exptl_absorpt_correction_T_max   1.00000 
_exptl_absorpt_process_details    SADABS 
  
_exptl_special_details 
; 
 ? 
; 
  
_diffrn_ambient_temperature       294(2) 
_diffrn_radiation_wavelength      0.71073 
_diffrn_radiation_type            MoK\a 
_diffrn_radiation_source          'fine-focus sealed tube' 
_diffrn_radiation_monochromator   graphite 
_diffrn_measurement_device_type   'CCD area detector' 
_diffrn_measurement_method        'phi and omega scans' 
_diffrn_detector_area_resol_mean  ? 
_diffrn_standards_number          . 
_diffrn_standards_interval_count  . 
_diffrn_standards_interval_time   . 
_diffrn_standards_decay_%         . 
_diffrn_reflns_number             4049 
_diffrn_reflns_av_R_equivalents   0.0286 
_diffrn_reflns_av_sigmaI/netI     0.0195 
_diffrn_reflns_limit_h_min        -9 
_diffrn_reflns_limit_h_max        8 
_diffrn_reflns_limit_k_min        -12 
_diffrn_reflns_limit_k_max        7 
_diffrn_reflns_limit_l_min        -11 
_diffrn_reflns_limit_l_max        11 
_diffrn_reflns_theta_min          2.92 
_diffrn_reflns_theta_max          26.42 
_reflns_number_total              828 
_reflns_number_gt                 766 
_reflns_threshold_expression      >2sigma(I) 
  
_computing_data_collection        'Bruker SMART' 
_computing_cell_refinement        'Bruker SMART' 
_computing_data_reduction         'Bruker SAINT' 
_computing_structure_solution     'SHELXS-97 (Sheldrick, 1990)' 
_computing_structure_refinement   'SHELXL-97 (Sheldrick, 1997)' 
_computing_molecular_graphics     'Bruker SHELXTL' 
_computing_publication_material   'Bruker SHELXTL' 
  
_refine_special_details 
; 
 Refinement of F^2^ against ALL reflections.  The weighted R-factor wR and 
 goodness of fit S are based on F^2^, conventional R-factors R are based 
 on F, with F set to zero for negative F^2^. The threshold expression of 
 F^2^ > 2sigma(F^2^) is used only for calculating R-factors(gt) etc. and is 
 not relevant to the choice of reflections for refinement.  R-factors based 
 on F^2^ are statistically about twice as large as those based on F, and R- 
 factors based on ALL data will be even larger. 
; 
  
_refine_ls_structure_factor_coef  Fsqd 
_refine_ls_matrix_type            full 
_refine_ls_weighting_scheme       calc 
_refine_ls_weighting_details 
 'calc w=1/[\s^2^(Fo^2^)+(0.0257P)^2^+2.1128P] where P=(Fo^2^+2Fc^2^)/3' 
_atom_sites_solution_primary      direct 
_atom_sites_solution_secondary    difmap 
_atom_sites_solution_hydrogens    geom 
_refine_ls_hydrogen_treatment     CONSTR 
_refine_ls_extinction_method      none 
_refine_ls_extinction_coef        ? 
_refine_ls_number_reflns          828 
_refine_ls_number_parameters      70 
_refine_ls_number_restraints      6 
_refine_ls_R_factor_all           0.0218 
_refine_ls_R_factor_gt            0.0191 
_refine_ls_wR_factor_ref          0.0535 
_refine_ls_wR_factor_gt           0.0519 
_refine_ls_goodness_of_fit_ref    1.163 
_refine_ls_restrained_S_all       1.159 
_refine_ls_shift/su_max           0.000 
_refine_ls_shift/su_mean          0.000 
  
loop_ 
 _atom_site_label 
 _atom_site_type_symbol 
 _atom_site_fract_x 
 _atom_site_fract_y 
 _atom_site_fract_z 
 _atom_site_U_iso_or_equiv 
 _atom_site_adp_type 
 _atom_site_occupancy 
 _atom_site_symmetry_multiplicity 
 _atom_site_calc_flag 
 _atom_site_refinement_flags 
 _atom_site_disorder_assembly 
 _atom_site_disorder_group 
Pr1 Pr 0.15954(3) 0.7500 -0.17360(3) 0.01240(12) Uani 1 2 d S . . 
O1 O 0.1868(3) 0.5406(3) 0.0014(3) 0.0163(5) Uani 1 1 d U . . 
O2 O 0.1247(4) 0.4081(3) 0.1811(3) 0.0167(6) Uani 1 1 d . . . 
O3 O -0.0041(5) 0.7500 0.5577(4) 0.0235(9) Uani 1 2 d S . . 
O4 O 0.1202(5) 0.7500 0.1429(3) 0.0117(7) Uani 1 2 d S . . 
C1 C 0.1400(4) 0.5178(3) 0.1227(4) 0.0119(7) Uani 1 1 d . . . 
C2 C 0.0993(4) 0.6356(3) 0.2141(4) 0.0119(7) Uani 1 1 d . . . 
C3 C 0.0548(5) 0.6312(4) 0.3498(4) 0.0155(7) Uani 1 1 d . . . 
H3 H 0.0386 0.5507 0.3932 0.019 Uiso 1 1 calc R . . 
C4 C 0.0318(7) 0.7500 0.4293(5) 0.0172(11) Uani 1 2 d S . . 
  
loop_ 
 _atom_site_aniso_label 
 _atom_site_aniso_U_11 
 _atom_site_aniso_U_22 
 _atom_site_aniso_U_33 
 _atom_site_aniso_U_23 
 _atom_site_aniso_U_13 
 _atom_site_aniso_U_12 
Pr1 0.01586(17) 0.01052(17) 0.01081(17) 0.000 0.00107(10) 0.000 
O1 0.0228(14) 0.0132(12) 0.0129(13) 0.0020(10) 0.0051(10) 0.0024(10) 
O2 0.0209(14) 0.0110(14) 0.0183(14) 0.0066(10) -0.0031(10) -0.0014(11) 
O3 0.020(2) 0.041(2) 0.0089(17) 0.000 0.0019(15) 0.000 
O4 0.025(2) 0.0047(16) 0.0052(15) 0.000 0.0039(14) 0.000 
C1 0.0112(16) 0.0096(17) 0.0148(16) 0.0013(14) -0.0041(13) 0.0006(13) 
C2 0.0137(17) 0.0110(17) 0.0109(16) 0.0023(14) 0.0004(13) 0.0002(14) 
C3 0.0172(18) 0.0177(19) 0.0116(16) 0.0050(14) 0.0017(14) 0.0006(15) 
C4 0.011(2) 0.029(3) 0.011(2) 0.000 0.001(2) 0.000 
  
_geom_special_details 
; 
 All esds (except the esd in the dihedral angle between two l.s. planes) 
 are estimated using the full covariance matrix.  The cell esds are taken 
 into account individually in the estimation of esds in distances, angles 
 and torsion angles; correlations between esds in cell parameters are only 
 used when they are defined by crystal symmetry.  An approximate (isotropic) 
 treatment of cell esds is used for estimating esds involving l.s. planes. 
; 
  
loop_ 
 _geom_bond_atom_site_label_1 
 _geom_bond_atom_site_label_2 
 _geom_bond_distance 
 _geom_bond_site_symmetry_2 
 _geom_bond_publ_flag 
Pr1 O1 2.723(3) . ? 
Pr1 O1 2.723(3) 8_575 ? 
Pr1 O2 2.729(3) 7_665 ? 
Pr1 O2 2.729(3) 2_564 ? 
Pr1 O2 2.771(3) 4 ? 
Pr1 O2 2.771(3) 5_565 ? 
Pr1 O3 2.869(4) 1_554 ? 
Pr1 O3 2.883(4) 6_656 ? 
O1 C1 1.236(4) . ? 
O2 C1 1.258(4) . ? 
O2 Pr1 2.729(3) 2_565 ? 
O2 Pr1 2.771(3) 5_565 ? 
O3 C4 1.256(6) . ? 
O3 Pr1 2.869(4) 1_556 ? 
O3 Pr1 2.883(4) 6_556 ? 
O4 C2 1.363(4) . ? 
O4 C2 1.363(4) 8_575 ? 
C1 C2 1.522(5) . ? 
C2 C3 1.340(5) . ? 
C3 C4 1.443(5) . ? 
C3 H3 0.9300 . ? 
C4 C3 1.443(5) 8_575 ? 
  
loop_ 
 _geom_angle_atom_site_label_1 
 _geom_angle_atom_site_label_2 
 _geom_angle_atom_site_label_3 
 _geom_angle 
 _geom_angle_site_symmetry_1 
 _geom_angle_site_symmetry_3 
 _geom_angle_publ_flag 
O1 Pr1 O1 103.73(11) . 8_575 ? 
O1 Pr1 O2 136.63(8) . 7_665 ? 
O1 Pr1 O2 78.17(8) 8_575 7_665 ? 
O1 Pr1 O2 78.17(8) . 2_564 ? 
O1 Pr1 O2 136.63(8) 8_575 2_564 ? 
O2 Pr1 O2 72.66(12) 7_665 2_564 ? 
O1 Pr1 O2 122.62(8) . 4 ? 
O1 Pr1 O2 67.75(8) 8_575 4 ? 
O2 Pr1 O2 98.59(9) 7_665 4 ? 
O2 Pr1 O2 147.20(4) 2_564 4 ? 
O1 Pr1 O2 67.75(8) . 5_565 ? 
O1 Pr1 O2 122.62(8) 8_575 5_565 ? 
O2 Pr1 O2 147.20(4) 7_665 5_565 ? 
O2 Pr1 O2 98.59(9) 2_564 5_565 ? 
O2 Pr1 O2 71.39(12) 4 5_565 ? 
O1 Pr1 O3 125.61(6) . 1_554 ? 
O1 Pr1 O3 125.61(6) 8_575 1_554 ? 
O2 Pr1 O3 80.20(9) 7_665 1_554 ? 
O2 Pr1 O3 80.20(9) 2_564 1_554 ? 
O2 Pr1 O3 67.09(8) 4 1_554 ? 
O2 Pr1 O3 67.09(8) 5_565 1_554 ? 
O1 Pr1 O3 72.07(7) . 6_656 ? 
O1 Pr1 O3 72.07(7) 8_575 6_656 ? 
O2 Pr1 O3 67.43(8) 7_665 6_656 ? 
O2 Pr1 O3 67.43(8) 2_564 6_656 ? 
O2 Pr1 O3 139.44(6) 4 6_656 ? 
O2 Pr1 O3 139.44(6) 5_565 6_656 ? 
O3 Pr1 O3 139.35(11) 1_554 6_656 ? 
C1 O1 Pr1 134.2(2) . . ? 
C1 O2 Pr1 133.8(2) . 2_565 ? 
C1 O2 Pr1 126.0(2) . 5_565 ? 
Pr1 O2 Pr1 100.10(9) 2_565 5_565 ? 
C4 O3 Pr1 140.1(4) . 1_556 ? 
C4 O3 Pr1 125.6(3) . 6_556 ? 
Pr1 O3 Pr1 94.31(11) 1_556 6_556 ? 
C2 O4 C2 118.3(4) . 8_575 ? 
O1 C1 O2 127.6(3) . . ? 
O1 C1 C2 116.7(3) . . ? 
O2 C1 C2 115.6(3) . . ? 
C3 C2 O4 122.8(3) . . ? 
C3 C2 C1 125.5(3) . . ? 
O4 C2 C1 111.6(3) . . ? 
C2 C3 C4 120.7(3) . . ? 
C2 C3 H3 119.6 . . ? 
C4 C3 H3 119.6 . . ? 
O3 C4 C3 122.7(2) . 8_575 ? 
O3 C4 C3 122.7(2) . . ? 
C3 C4 C3 114.7(4) 8_575 . ? 
  
loop_ 
 _geom_torsion_atom_site_label_1 
 _geom_torsion_atom_site_label_2 
 _geom_torsion_atom_site_label_3 
 _geom_torsion_atom_site_label_4 
 _geom_torsion 
 _geom_torsion_site_symmetry_1 
 _geom_torsion_site_symmetry_2 
 _geom_torsion_site_symmetry_3 
 _geom_torsion_site_symmetry_4 
 _geom_torsion_publ_flag 
O1 Pr1 O1 C1 35.6(4) 8_575 . . . ? 
O2 Pr1 O1 C1 122.8(3) 7_665 . . . ? 
O2 Pr1 O1 C1 171.1(3) 2_564 . . . ? 
O2 Pr1 O1 C1 -36.5(3) 4 . . . ? 
O2 Pr1 O1 C1 -84.3(3) 5_565 . . . ? 
O3 Pr1 O1 C1 -120.2(3) 1_554 . . . ? 
O3 Pr1 O1 C1 101.3(3) 6_656 . . . ? 
Pr1 O1 C1 O2 161.6(3) . . . . ? 
Pr1 O1 C1 C2 -19.8(5) . . . . ? 
Pr1 O2 C1 O1 87.6(4) 2_565 . . . ? 
Pr1 O2 C1 O1 -87.4(4) 5_565 . . . ? 
Pr1 O2 C1 C2 -91.1(4) 2_565 . . . ? 
Pr1 O2 C1 C2 94.0(3) 5_565 . . . ? 
C2 O4 C2 C3 1.8(7) 8_575 . . . ? 
C2 O4 C2 C1 -175.7(3) 8_575 . . . ? 
O1 C1 C2 C3 -176.5(4) . . . . ? 
O2 C1 C2 C3 2.2(5) . . . . ? 
O1 C1 C2 O4 0.8(5) . . . . ? 
O2 C1 C2 O4 179.6(3) . . . . ? 
O4 C2 C3 C4 -2.0(6) . . . . ? 
C1 C2 C3 C4 175.1(4) . . . . ? 
Pr1 O3 C4 C3 -89.7(5) 1_556 . . 8_575 ? 
Pr1 O3 C4 C3 90.3(5) 6_556 . . 8_575 ? 
Pr1 O3 C4 C3 89.7(5) 1_556 . . . ? 
Pr1 O3 C4 C3 -90.3(5) 6_556 . . . ? 
C2 C3 C4 O3 -177.5(5) . . . . ? 
C2 C3 C4 C3 2.0(7) . . . 8_575 ? 
  
_diffrn_measured_fraction_theta_max    0.995 
_diffrn_reflns_theta_full              26.42 
_diffrn_measured_fraction_theta_full   0.995 
_refine_diff_density_max    0.490 
_refine_diff_density_min   -1.027 
_refine_diff_density_rms    0.137 
